# Supplementary material for: S,N-Codoped oil-soluble fluorescent carbon dots for a high color-rendering WLED
Source: Royal Society of Chemistry journal article supplement (doi:10.1039/d0tc00016g), 2020-01-01
Supplement: d0tc00016g1.pdf [file d0tc00016g1.pdf]

## *Supporting Information*

# **S, N-Codoped oil-soluble fluorescent carbon dots for a high color-rendering WLED**

*Quan Wang<sup>1,#</sup>, Yixun Gao<sup>1,#</sup>, Boyang Wang<sup>2</sup>, Yuanyuan Guo<sup>1</sup>, Umar, Ahmad<sup>3</sup>, Yanqing Wang<sup>4</sup>, Yao Wang<sup>1,\*</sup>, Siyu Lu<sup>2,\*</sup>, Hao Li<sup>1,\*</sup> and Guofu Zhou<sup>1</sup>*

<sup>1</sup>Guangdong Provincial Key Laboratory of Optical Information Materials and Technology, Institute of Electronic Paper Displays, South China Academy of Advanced Optoelectronics, South China Normal University, Guangzhou 510006, P. R. China.

<sup>2</sup>Henan Institute of Advanced Technology, College of Chemistry, Zhengzhou University, Zhengzhou 450001, P. R. China

<sup>3</sup>Department of Chemistry, Faculty of Science and Arts and Promising Centre for Sensors and Electronic Devices, Najran University, Najran 11001, Kingdom of Saudi Arabia.

<sup>4</sup>Varitronix (He Yuan) Display Technology Limited, He Yuan 517000, P. R. China.

*# These authors contributed equally to this work.*

*\* Corresponding Author: Yao Wang, Email: [wangyao@m.scnu.edu.cn](mailto:wangyao@m.scnu.edu.cn)*

*Siyu Lu, Email: [sylu2013@zzu.edu.cn](mailto:sylu2013@zzu.edu.cn)*

*Hao Li, E-mail: [haoli@scnu.edu.cn](mailto:haoli@scnu.edu.cn)*

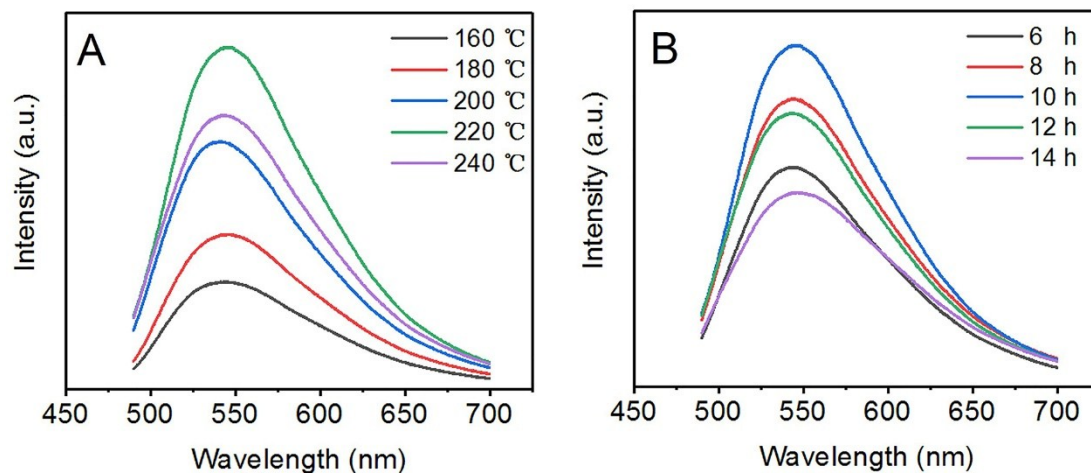

**Figure S1** PL emission spectra of the S, N-codoped oil-soluble carbon dots (S, N-OCDs) under different preparation conditions: different heating temperatures for the same reaction time of 10 hours (A), and different reaction time at the same heating temperature of 220 °C (B).

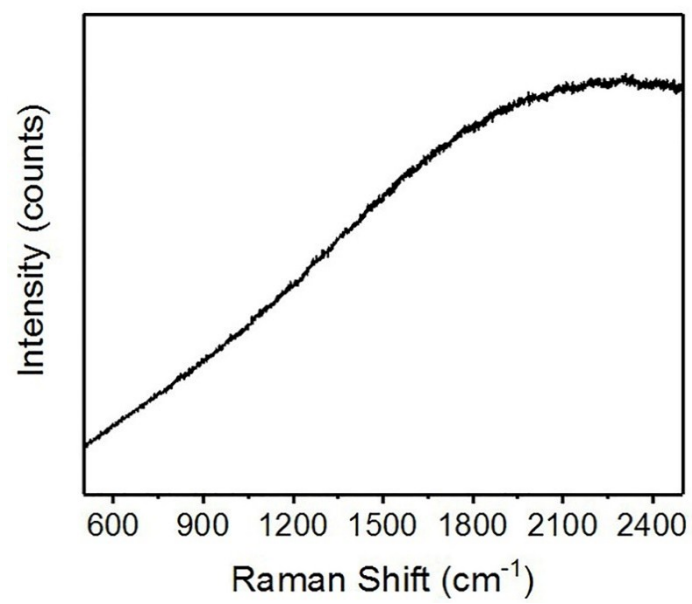

**Figure S2** Raman spectrum of the S, N-OCDs

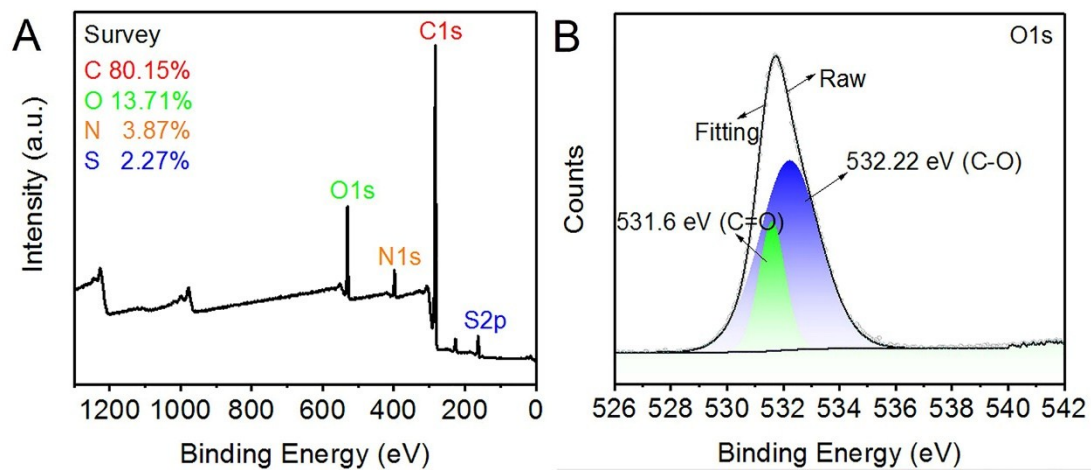

**Figure S3** XPS survey spectrum (A) and O1s high-resolution XPS spectra of the S, N-OCDs (B).

**Table S1** Elemental analysis results of the S, N-OCDs.

| <b>Element</b> | <b>C</b> | <b>N</b> | <b>H</b> | <b>O*</b> | <b>S</b> |
|----------------|----------|----------|----------|-----------|----------|
| Content (wt%)  | 69.85    | 6.26     | 7.21     | 7.5       | 9.18     |

*Notes:* The content of oxygen element is obtained by calculation.

**Table S2** Characteristic comparison on luminescent performances of semiconductor QDs and their modified WLEDs

| Sample                        | CDs            |                |           | Color converter                                  | WLED       |          |                          |                                       | Reference |
|-------------------------------|----------------|----------------|-----------|--------------------------------------------------|------------|----------|--------------------------|---------------------------------------|-----------|
|                               | Ex. WL<br>(nm) | Em. WL<br>(nm) | QY<br>(%) |                                                  | CCT<br>(K) | CRI / Ra | CIE Color<br>Coordinates | Working Current/<br>Operating Voltage |           |
| ZnO QDs                       | 357            | 561            | 17        | ZnO QDs / epoxy<br>composites                    | —          | —        | (0.305, 0.362)           | 10 mA                                 | [S1]      |
| ZnO QDs                       | 350            | 545            | 1.3       | ZnO QDs / Zn(MSA) <sub>2</sub><br>composites     | 6517       | 82       | (0.31,0.36)              | —                                     | [S2]      |
| CdS QDs                       | 425            | 575            | —         | CdS QDs / PMMA<br>composites                     | 4619       | 87.9     | (0.353, 0.335)           | 5 mA                                  | [S3]      |
| Mn–Cu co-<br>doped ZnS<br>NPs | 365            | 596            | 62        | Mn–Cu codoped ZnS<br>NPs / PVA<br>composites     | 4227       | —        | (0.28,0.43)              | 3.8 V                                 | [S4]      |
| CdSe@ZnS<br>core-shell<br>NCs | 452            | 555<br>613     | —         | CdSe@ZnS core-<br>shell NCs / PMMA<br>composites | 3228       | 82.4     | (0.37,0.30)              | —                                     | [S5]      |
| S, N-OCDs                     | 480            | 545            | 21.08     | S, N-CDs / epoxy<br>composites                   | 5389       | 88.4     | (0.33,0.30)              | 20 mA / 4 V                           | This work |

*Notes:* “QDs” is the abbreviation of quantum dots; “NPs” is the abbreviation of nanoparticles; “NCs” is the abbreviation of nanocrystals.

**Table S3** The oil-solubility of S, N-OCDs in different solvents

| <b>Solvent type</b>  | <b>volume</b> | <b>The mass of S, N-OCDs</b> |
|----------------------|---------------|------------------------------|
| <b>acetone</b>       | 1 mL          | > 10 mg                      |
| <b>DMF</b>           | 1 mL          | > 10 mg                      |
| <b>ethyl alcohol</b> | 1 mL          | ~ 2 mg                       |
| <b>water</b>         | 1 mL          | < 0.1 mg                     |

## References

- S1. J. J. Huang, Y. B. Ye, Z. Q. Lei, X. J. Ye, M. Z. Rong and M. Q. Zhang, *Physical Chemistry Chemical Physics*, 2014, **16**, 5480-5484.
- S2. S. Roy, S. Pramanik, S. Bhandari and A. Chattopadhyay, *Langmuir*, 2017, **33**, 14627-14633.
- S3. F. Li, C. Nie, L. You, X. Jin, Q. Zhang, Y. Qin, F. Zhao, Y. Song, Z. Chen and Q. Li, *Nanotechnology*, 2018, **29**, 205701.
- S4. P. Kumbhakar, S. Biswas, P. Pandey, C. S. Tiwary and P. Kumbhakar, *Nanoscale*, 2019, **11**, 2017-2026.
- S5. S. Nizamoglu, G. Zengin and H. V. Demir, *Appl. Phys. Lett.*, 2008, **92**, 031102.
